# Supplementary material for: Notch ligands regulate the muscle stem-like state ex vivo but are not sufficient for retaining regenerative capacity
Source: PubMed Central journal article supplement (PMC5428926; doi:10.1371/journal.pone.0177516), 2017-05-12
Supplement: pone.0177516.s001.pdf [file pone.0177516.s001.pdf]

**S1 Table. Primer sequences for Real-time PCR.**

| <b>For mouse Exp.</b> |     | <b>Sequence</b>          | <b>Product (bp)</b> |
|-----------------------|-----|--------------------------|---------------------|
| Hes1                  | Fwd | ACACCGGACAAACCAAAGAC     | 148                 |
|                       | Rev | AATGCCGGGAGCTATCTTTC     |                     |
| Hey1                  | Fwd | CACCTGAAAATGCTGCACAC     | 122                 |
|                       | Rev | ATGCTCAGATAACGGGCAAC     |                     |
| HeyL                  | Fwd | GTCTTGCAGATGACCGTGGA     | 73                  |
|                       | Rev | CTCGGGCATCAAAGAACCCT     |                     |
| MyoD                  | Fwd | CACTACAGTGGCGACTCAGATGCA | 144                 |
|                       | Rev | CCTGGACTCGCGCGCCGCCTCACT |                     |
| Pax7                  | Fwd | GACAAAGGGAACCGTCTGGAT    | 96                  |
|                       | Rev | TGTGAACGTGGTCCGACTG      |                     |
| Rpl13a                | Fwd | GTGGTCCCTGCTGCTCTCAAG    | 152                 |
|                       | Rev | CGATAGTGCATCTTGGCCTTTT   |                     |
| <b>For human Exp.</b> |     | <b>Sequence</b>          | <b>Product (bp)</b> |
| HES1                  | Fwd | AAGAAAGATAGCTCGCGGCA     | 134                 |
|                       | Rev | TACTTCCCCAGCACACTTGG     |                     |
| HEY1                  | Fwd | CCTTCCCCTTCTCTTTCGGC     | 126                 |
|                       | Rev | AAAAGCTCCGATCTCCGTCC     |                     |
| HEYL                  | Fwd | AGACCGCATCAACAGTAGCC     | 115                 |
|                       | Rev | GTGATCCACCGTCATCTGC      |                     |
| MYOD1                 | Fwd | GCCACAACGGACGACTTCTATG   | 116                 |
|                       | Rev | TGCTCTTCGGGTTTCAGGAG     |                     |
| PAX7                  | Fwd | GACCCCTGCCTAACCACATC     | 133                 |
|                       | Rev | GTCTCCTGGTAGCGGCAAAG     |                     |
| GAPDH                 | Fwd | CCATCACCATCTTCCAGGAG     | 117                 |
|                       | Rev | AATGAGCCCCAGCCTTCTCC     |                     |
