# Supplementary material for: Notch ligands regulate the muscle stem-like state ex vivo but are not sufficient for retaining regenerative capacity
Source: PubMed Central journal article supplement (PMC5428926; doi:10.1371/journal.pone.0177516), 2017-05-12
Supplement: pone.0177516.s002.pdf [file pone.0177516.s002.pdf]

**S2 Table. List of primary antibodies.**

| <b>Antibody</b>       | <b>Clone</b> | <b>Ig type</b> | <b>Supplier</b> | <b>Catalog number</b> | <b>Application and dilution</b> |
|-----------------------|--------------|----------------|-----------------|-----------------------|---------------------------------|
| <b>For mouse Exp.</b> |              |                |                 |                       |                                 |
| Pax7                  | PAX7         | Mouse IgG1, k  | DSHB            | PAX7                  | ICC: x20 (supernatant)          |
| MyoD                  | 5.8A         | Mouse IgG1, k  | DAKO            | M3512                 | ICC: x200                       |
| Myogenin              | F5D          | Mouse IgG1, k  | DSHB            | F5D                   | ICC: x20                        |
| Dystrophin            | Polyclonal   | Rabbit IgG     | Abcam           | ab15277               | IHC: x500                       |
| <b>For human Exp.</b> |              |                |                 |                       |                                 |
| PAX7                  | PAX7         | Mouse IgG1, k  | DSHB            | Pax7                  | ICC: x2 (supernatant)           |
| MYOD                  | EPR6653-131  | Rabbit IgG     | Abcam           | ab133627              | ICC: x150                       |
| SPECTRIN              | RBC2/3D5     | Mouse IgG2b    | Abnova          | MAB9510               | IHC: x100                       |
| LAMIN A/C             | EPR4100      | Rabbit IgG     | Abcam           | ab108595              | IHC: x400                       |
